# Supplementary material for: Genome-Wide Association Study of Metabolic Traits Reveals Novel Gene-Metabolite-Disease Links
Source: PLOS journal article supplement (doi:10.1371/journal.pgen.1004132), 2014-02-20
Supplement: S5 (10.1371/journal.pgen.1004132.s005) [file journal.pgen.1004132.s005]

| SNP (control) | Gene           | Metabolite             | $P_{\text{ref}}$      | Spectrum    | Cohort  | $P_C$                  | Rank      |
|---------------|----------------|------------------------|-----------------------|-------------|---------|------------------------|-----------|
| rs37369       | <i>AGXT2</i>   | 3-aminoisobutyrate     | $3.2 \times 10^{-75}$ | multi-peak  | SHIP    | $1.0 \times 10^{-46}$  | 1         |
| rs8101881     | <i>SLC7A9</i>  | lysine                 | $1.0 \times 10^{-8}$  | multi-peak  | SHIP    | $1.5 \times 10^{-15}$  | 1         |
| rs17279437    | <i>SLC6A20</i> | dimethylglycine        | $5.5 \times 10^{-10}$ | multi-peak  | SHIP    | $4.6 \times 10^{-10}$  | 3         |
| rs11884776    | <i>ALMS1</i>   | N-acetylated compounds | $4.1 \times 10^{-19}$ | multi-peak  | MolPAGE | $1.0 \times 10^{-123}$ | 3, 14, 21 |
| rs4539242     | <i>PYROXD2</i> | trimethylamine         | $2.8 \times 10^{-23}$ | single peak | MolPAGE | $1.7 \times 10^{-128}$ | 44        |
| rs830124      | <i>PSMD9</i>   | 2-hydroxyisobutyrate   | $1.6 \times 10^{-15}$ | single peak | SHIP    | $6.6 \times 10^{-11}$  | 65        |
| rs1495743     | <i>NAT2</i>    | formate                | $1.4 \times 10^{-10}$ | single peak | SHIP    | $6.0 \times 10^{-7}$   | 222 (9)   |
